# Supplementary material
Source: HighWire-hosted journal article supplement (https://erj.ersjournals.com/content/54/5/1802419)
Supplement: inline-supplementary-material-1 [file inline-supplementary-material-1.pdf]

## SUPPLEMENTARY FILES

### Supplementary Methods

#### **Nasal wash procedure**

*Obtaining nasal wash sample:* We atomize 2ml of warm (37°C) phosphate-buffered saline (PBS) solution into the child's nostril using a MAD Nasal® atomizer during breath-holding. The child is sitting, leaning slightly forward with the head bent slightly forward while holding a 15 mL centrifuge tube into which is placed the neck of a glass funnel (10-15 ml diameter). The funnel is placed below the nose while we atomize slowly the PBS aerosol into the nostril, ensuring that the child holds their breath. Once the syringe is emptied and removed from the nostril, the child blows strongly through the nose into the funnel while the opposite nostril is occluded. This same procedure is repeated in the other nostril and then we wash the funnel with 2ml of PBS solution before removing the 15ml centrifuge tube.

*Processing of nasal wash sample:* After shaking the sample gently on a mixer for 15 minutes, we centrifuge at 6000 RPM for 10 minutes. We then store some samples at -80°C and discard the remaining supernatant fluid. We place 250µl of pellet into two Cytospin funnels (125µl each) and centrifuge at 700 RPM for 4 minutes (Rotofix cytocentrifuge). We dry and stain slides with Wrights for direct observation under the microscope.

#### **Spirometry estimations**

The percentage of predicted spirometry values for age and height were estimated using Global Lung Initiative standards [1] and the FEV1 post-bronchodilator improvement was calculated as:  $(\text{Post FEV1} - \text{Pre FEV1} / \text{Pre FEV1}) \times 100\%$ .

#### **Indications for starting inhaled corticosteroids (ICS)**

The most updated Ecuadorian guidelines that we applied are based on the GINA 2008[2] and Spanish GEMA 2009[3] guidelines. They recommend controller ICS in children with persistent asthma or frequent episodic asthma (not more than 1 exacerbation every 5-6 weeks, with a maximum of 6-8 exacerbations per year and without symptoms between the exacerbations).

#### **Statistical analysis:**

##### **Sample size estimation**

We calculated that a cohort of 250 children with a severe asthma attack would provide 80% power to detect factors that reduce the proportion of children re-attending the emergency room within 6 months from 50% to 31.4% (hazard ratio of  $\geq 1.46$ ), and 90% power to detect factors that reduce the proportion of children re-attending emergency room within 1 year from 50% to 33.9% (hazard ratio of  $\geq 1.37$ ). The expected proportion of children suffering a subsequent asthma attack requiring emergency care was estimated to be 50% over the following 6 months, based on our previous findings in this same setting[4].

## Missing data strategy

To investigate the effect of missing values for variables with greater than 5% missing data, we performed a sensitivity analysis using the “ice”[5] procedure for multiple imputation in Stata 13.1. The “mim” procedure in Stata[6] was then used to average the estimates of results across the 20 imputed data sets created, according to Rubin's rules[7]. The imputation models included all variables selected, the outcome of interest, and the Nelson Aalen estimator of the cumulative baseline hazard [8]. There was no difference in the final logistic regression and Cox regression multivariable models obtained when using the multiple imputation dataset compared to the original dataset (data not shown).

## References

1. Quanjer PH, Stanojevic S, Cole TJ, Baur X, Hall GL, Culver BH, Enright PL, Hankinson JL, Ip MS, Zheng J, Stocks J, ERS Global Lung Function Initiative. Multi-ethnic reference values for spirometry for the 3-95-yr age range: the global lung function 2012 equations. *Eur Respir J* 2012; 40: 1324-1343.
2. Bateman ED, Hurd SS, Barnes PJ, Bousquet J, Drazen JM, FitzGerald M, Gibson P, Ohta K, O'Byrne P, Pedersen SE, Pizzichini E, Sullivan SD, Wenzel SE, Zar HJ. Global strategy for asthma management and prevention: GINA executive summary. *Eur Respir J* 2008; 31: 143-178.
3. SEPAR, SEAIC, SEORL, semFYC, SEMERGEN, SEMG, GRAP, SEICAP, SENP. Gema 2009. Guía española para el manejo del asma. 2009.
4. Ardura-Garcia C, Vaca M, Oviedo G, Sandoval C, Workman L, Schuyler AJ, Perzanowski MS, Platts-Mills TA, Cooper PJ. Risk factors for acute asthma in tropical America: a case-control study in the City of Esmeraldas, Ecuador. *Pediatr Allergy Immunol* 2015; 26: 423-430.
5. Royston P. Multiple imputation of missing values. *Stata Journal* 2004; 4: 227-241.
6. Royston P, Carlin JB, White IR. Multiple imputation of missing values: new features for mim. *Stata Journal* 2009; 9: 252.
7. Rubin DB. Multiple Imputation for Nonresponse in Surveys. John Wiley & Sons, 2004.
8. White IR, Royston P. Imputing missing covariate values for the Cox model. *Stat Med* 2009; 28: 1982-1998.

## Supplementary Results

With respect to food triggers, of the 93 children who reported food-induced asthma attacks, 70 reported cold drink or foods as triggers, 28 reported specific foods (milk, nuts, etc.), 5 reported both, and 2 did not specify the food trigger. The most common specific food triggers reported were artificial drinks and food colorants (both reported in 7 children). Allergen specific IgE for food mix was measured in a random sample of 59 children, with a positive result in 25 (42%) of them. There was no association between a positive food mix IgE and recurrence (OR: 1.08; 95% CI: 0.39-3.04). There was also no association between having reported a food trigger for asthma attacks and having a positive food mix IgE result (OR: 0.77; 95% CI: 0.26-2.31).

**Table S1:** Exposures studied as potential predictors of recurrent asthma attacks, and available data out of 270 children that completed at least 2 weeks of follow-up (included in Cox regression analysis).

| Exposure / predictor                       | Available data (N) | Method                  |
|--------------------------------------------|--------------------|-------------------------|
| <b>Demographics</b>                        |                    |                         |
| - Age                                      | 270                | Questionnaire           |
| - Sex                                      | 270                | Questionnaire           |
| - Ethnicity                                | 266                | Questionnaire           |
| - Siblings                                 | 269                | Questionnaire           |
| - Household location                       | 268                | Questionnaire           |
| - Overcrowding                             | 269                | Questionnaire           |
| - Monthly household income                 | 248                | Questionnaire           |
| - Parental level of education              | 266                | Questionnaire           |
| <b>Personal history</b>                    |                    |                         |
| - Gestational age                          | 261                | Questionnaire           |
| - Birthweight                              | 126                | Questionnaire           |
| - Breastfeeding                            | 266                | Questionnaire           |
| - Bronchiolitis/pneumonia as infant        | 261                | Questionnaire           |
| <b>Asthma history</b>                      |                    |                         |
| - Wheezing ever                            | 267                | Questionnaire           |
| - Wheezing last 12m                        | 266                | Questionnaire           |
| - Doctor's asthma diagnosis                | 266                | Questionnaire           |
| - Date last asthma attack                  | 228                | Questionnaire           |
| - Number of severe exacerbations last year | 265                | Questionnaire           |
| - ER attendance last year                  | 268                | Questionnaire           |
| - Number of ER attendance/s last year      | 267                | Questionnaire           |
| - Hospitalization/s last year / ever       | 268                | Questionnaire           |
| - Admitted to ICU ever                     | 267                | Questionnaire           |
| <b>Asthma treatment previous year</b>      |                    |                         |
| - Inhaled corticosteroids                  | 266                | Questionnaire           |
| - Leukotriene inhibitors                   | 266                | Questionnaire           |
| - Inhaled/nebulised SABA                   | 266                | Questionnaire           |
| - No. oral corticosteroids courses         | 264                | Questionnaire           |
| - No. parenteral corticosteroids courses   | 264                | Questionnaire           |
| <b>Asthma symptoms</b>                     |                    |                         |
| - Asthma control                           | 267                | C-ACT; ACT              |
| - Quality of life                          | 219                | PAQLQ                   |
| - Triggers (number and specific triggers)  | 165                | Questionnaire           |
| - Total time last year with symptoms       | 268                | Questionnaire           |
| - Nocturnal symptoms                       | 267                | Questionnaire           |
| - Symptoms with exercise                   | 260                | Questionnaire           |
| - Pulmonary function                       | 227                | Lung function           |
| <b>Asthma knowledge</b>                    |                    |                         |
| - Poor asthma knowledge                    | 253                | NAKQ score              |
| - Asthma education sessions                | 269                | Questionnaire           |
| <b>Family history</b>                      |                    |                         |
| - Maternal rhinitis/asthma/eczema          | 261                | Questionnaire           |
| - Paternal rhinitis/asthma/eczema          | 259                | Questionnaire           |
| <b>Co-morbidities</b>                      |                    |                         |
| - Allergic rhinitis (Doctor's diagnosis)   | 267                | Questionnaire           |
| - Eczema (Doctor's diagnosis)              | 268                | Questionnaire           |
| - Obesity                                  | 249                | BMI (weight and height) |

|                                    |     |                  |
|------------------------------------|-----|------------------|
| <b>Environmental exposures</b>     |     |                  |
| - Air pollution at home area       | 269 | Questionnaire    |
| - Tobacco exposure at home         | 268 | Questionnaire    |
| - Humid household                  | 268 | Questionnaire    |
| - Mould in household               | 269 | Questionnaire    |
| - Carpets in household             | 269 | Questionnaire    |
| - Pets                             | 268 | Questionnaire    |
| <b>Inflammatory markers</b>        |     |                  |
| - Blood eosinophilia               | 261 | Blood sample     |
| - Nasal eosinophilia               | 157 | Nasal wash       |
| - Fraction of exhaled nitric oxide | 229 | FeNO measurement |

BMI: Body Mass Index; C-ACT: Childhood Asthma Control Test; ACT: Asthma Control Test; NAKQ: Newcastle Asthma Knowledge Questionnaire; PAQLQ: Pediatric Asthma Quality of Life Questionnaire; FeNO: Fraction of exhaled nitric oxide.

**Table S2:** Asthma control, asthma knowledge and quality of life of 264 participants followed up for 6 months or until first asthma attack recurrence, stratified by readmission status at 6 months.

|                                     | <b>Total Cohort<br/>(N=264)</b> | <b>Second asthma attack within 6 months</b> |                      |              |
|-------------------------------------|---------------------------------|---------------------------------------------|----------------------|--------------|
|                                     |                                 | <b>Yes (N=121)</b>                          | <b>No (N=143)</b>    | <b>P</b>     |
| C-ACT score (mean, SD)              | 16.0 (3.75)                     | 15.4 (4.05)                                 | 16.5 (3.41)          | 0.077        |
| ACT score (median, IQR)             | 16.0 (13-18)                    | 16.0 (14-18)                                | 15.5 (13-18)         | 0.936        |
| NAKQ score (median, IQR)            | <b>18 (16-20)</b>               | <b>17 (15-20)</b>                           | <b>18 (16-21)</b>    | <b>0.041</b> |
| PAQLQ total score (median, IQR)     | 3.5 (3.0-4.0)                   | 3.5 (2.9-4.0)                               | 3.5 (3.0-4.2)        | 0.275        |
| PAQLQ symptom score (median, IQR)   | 3.5 (2.8-4.1)                   | 3.6 (2.8-4.0)                               | 3.5 (2.8-4.2)        | 0.479        |
| PAQLQ activity score (median, IQR)  | 3.4 (2.6-4.0)                   | 3.4 (2.6-4.0)                               | 3.4 (2.6-4.2)        | 0.525        |
| PAQLQ emotional score (median, IQR) | <b>3.7 (3.1-4.5)</b>            | <b>3.5 (3.0-4.2)</b>                        | <b>3.9 (3.2-4.6)</b> | <b>0.030</b> |

IQR: Interquartile range; C-ACT: Childhood Asthma Control Test; ACT: Asthma Control Test; NAKQ: Newcastle Asthma Knowledge Questionnaire; PAQLQ: Pediatric Asthma Quality of Life Questionnaire. Bold: statistically significant differences (p<0.05)
