# Supplementary material
Source: HighWire-hosted journal article supplement (https://erj.ersjournals.com/content/54/5/1802419)
Supplement: inline-supplementary-material-2 [file inline-supplementary-material-2.pdf]

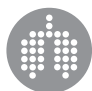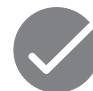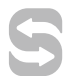

SHAREABLE PDF

# Predictors of severe asthma attack re-attendance in Ecuadorian children: a cohort study

Cristina Ardura-Garcia<sup>1,2</sup>, Erick Arias<sup>3</sup>, Paola Hurtado<sup>3</sup>, Laura J. Bonnett<sup>4</sup>, Carlos Sandoval<sup>3</sup>, Augusto Maldonado<sup>5</sup>, Lisa J. Workman<sup>6</sup>, Thomas A.E. Platts-Mills<sup>6</sup>, Philip J. Cooper<sup>3,7,8,11</sup> and John D. Blakey<sup>9,10,11</sup>

**Affiliations:** <sup>1</sup>Institute of Social and Preventive Medicine, University of Bern, Bern, Switzerland. <sup>2</sup>Liverpool School of Tropical Medicine, Liverpool, UK. <sup>3</sup>Fundación Ecuatoriana Para Investigación en Salud, Quito, Ecuador. <sup>4</sup>Dept of Biostatistics, University of Liverpool, Liverpool, UK. <sup>5</sup>Colegio de Ciencias de la Salud, Universidad San Francisco de Quito, Quito, Ecuador. <sup>6</sup>Asthma and Allergic Diseases Center, University of Virginia, Charlottesville, VA, USA. <sup>7</sup>Facultad de Ciencias Medicas, de la Salud y la Vida, Universidad Internacional del Ecuador, Quito, Ecuador. <sup>8</sup>Institute of Infection and Immunity, St George's University of London, London, UK. <sup>9</sup>Respiratory Medicine, Sir Charles Gairdner Hospital, Perth, Australia. <sup>10</sup>Medical School, Curtin University, Perth, Australia. <sup>11</sup>Both authors contributed equally.

**Correspondence:** Cristina Ardura-Garcia, Institute of Social and Preventive Medicine, University of Bern, Mittelstrasse 43, 3012 Bern, Switzerland. E-mail: crisardura@gmail.com

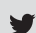

@ERSpublications

**Among children in a low-resource setting in Latin America, younger age, an established asthma diagnosis and history of severe asthma attacks in the previous year were associated with recurrence of severe asthma attacks, irrespective of biomarkers** <http://bit.ly/2TBzJcP>

**Cite this article as:** Ardura-Garcia C, Arias E, Hurtado P, *et al.* Predictors of severe asthma attack re-attendance in Ecuadorian children: a cohort study. *Eur Respir J* 2019; 54: 1802419 [<https://doi.org/10.1183/13993003.02419-2018>].

This single-page version can be shared freely online.

**ABSTRACT** Asthma is a common cause of emergency care attendance in low- and middle-income countries (LMICs). While few prospective studies of predictors for emergency care attendance have been undertaken in high-income countries, none have been performed in a LMIC.

We followed a cohort of 5–15-year-old children treated for asthma attacks in emergency rooms of public health facilities in Esmeraldas City, Ecuador. We collected blood and nasal wash samples, and performed spirometry and exhaled nitric oxide fraction measurements. We explored potential predictors for recurrence of severe asthma attacks requiring emergency care over 6 months' follow-up.

We recruited 283 children of whom 264 (93%) were followed-up for  $\geq 6$  months or until their next asthma attack. Almost half (46%) had a subsequent severe asthma attack requiring emergency care. Predictors of recurrence in adjusted analyses were (adjusted OR, 95% CI) younger age (0.87, 0.79–0.96 per year), previous asthma diagnosis (2.2, 1.2–3.9), number of parenteral corticosteroid courses in previous year (1.3, 1.1–1.5), food triggers (2.0, 1.1–3.6) and eczema diagnosis (4.2, 1.02–17.6). A parsimonious Cox regression model included the first three predictors plus urban residence as a protective factor (adjusted hazard ratio 0.69, 95% CI 0.50–0.95). Laboratory and lung function tests did not predict recurrence.

Factors independently associated with recurrent emergency attendance for asthma attacks were identified in a low-resource LMIC setting. This study suggests that a simple risk-assessment tool could potentially be created for emergency rooms in similar settings to identify higher-risk children on whom limited resources might be better focused.
